# Supplementary material for: TNK2‐AS1 upregulated by YY1 boosts the course of osteosarcoma through targeting miR‐4319/WDR1
Source: PubMed Central journal article supplement — Cancer Sci. 2020 Dec 1;112(2):893–905. doi: 10.1111/cas.14727 (PMC7893995; doi:10.1111/cas.14727), 2020-12-01
Supplement: CAS-112-893-s003.pdf [file CAS-112-893-s003.pdf]

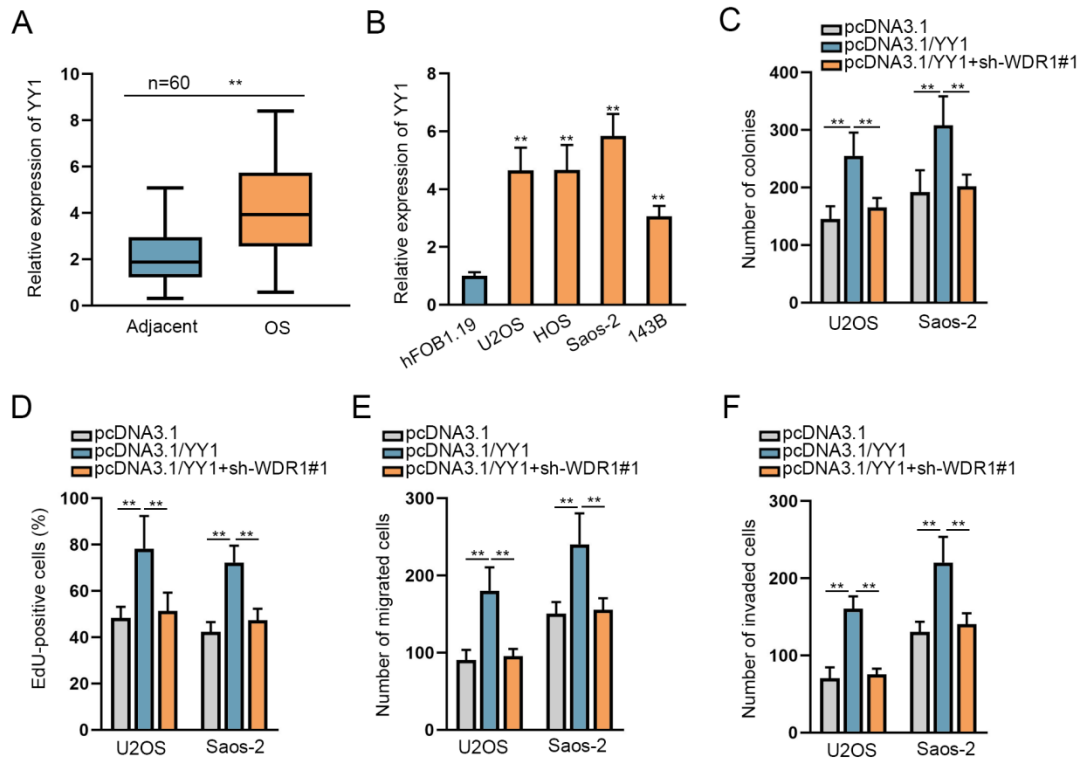

**Supplemental figure 3 YY1 was highly expressed in OS and it contributed to OS progression through enhancing WDR1**
