# Supplementary material for: TNK2‐AS1 upregulated by YY1 boosts the course of osteosarcoma through targeting miR‐4319/WDR1
Source: PubMed Central journal article supplement — Cancer Sci. 2020 Dec 1;112(2):893–905. doi: 10.1111/cas.14727 (PMC7893995; doi:10.1111/cas.14727), 2020-12-01
Supplement: CAS-112-893-s005.pdf [file CAS-112-893-s005.pdf]

Supplementary table 2 The miRNAs interacting with TNK2-AS1 predicted by starBase.

#Please cite:

#Zhou KR, Liu S, Cai L, Bin L, et al. ENCORI: The Encyclopedia of RNA Interactomes.

#Z Li JH, et al. starBase v2.0: decoding miRNA-cRNA, miRNA-ncRNA and protein-RNA interaction networks from large-scale CLIP-Seq data. Nucleic Acids Res. 2014 Jan;42:D92-7.

| miRNAid      | miRNAname        | geneID          | geneName | geneType  | chromosso | start     | end       | strand | clipExpN | degraExpRBP | merClass | miRseq  | align                   | targetSeq                 | pancancerNum |
|--------------|------------------|-----------------|----------|-----------|-----------|-----------|-----------|--------|----------|-------------|----------|---------|-------------------------|---------------------------|--------------|
| MIMAT0019909 | hsa-miR-4761-3p  | ENSG00000224614 | TNK2-AS1 | antisense | chr3      | 195635141 | 195635161 | +      | 1        | 0           | AG02     | 8mer    | ccguuucaacgcgUACGGGGAg  | agacuccuaagaAGGCCUa       | 0            |
| MIMAT0005936 | hsa-miR-1278     | ENSG00000224614 | TNK2-AS1 | antisense | chr3      | 195635167 | 195635188 | +      | 1        | 0           | AG02     | 7mer-m8 | uaucauacuaUACGUGUAGUa   | ccaauuaccAUACAGUACUG      | 1            |
| MIMAT0019818 | hsa-miR-4712-5p  | ENSG00000224614 | TNK2-AS1 | antisense | chr3      | 195635167 | 195635190 | +      | 1        | 0           | AG02     | 7mer-m8 | cuUUACU-CUCUG-GACAUGACU | ccAAUUAACCAACAGUACUGc     | 1            |
| MIMAT0003948 | hsa-miR-770-5p   | ENSG00000224614 | TNK2-AS1 | antisense | chr3      | 195635170 | 195635190 | +      | 1        | 0           | AG02     | 7mer-m8 | accgGACUGUGCACCAUGACCU  | auuaCAUACAC-AGUACUGGc     | 4            |
| MIMAT0007888 | hsa-miR-1913     | ENSG00000224614 | TNK2-AS1 | antisense | chr3      | 195637238 | 195637258 | +      | 1        | 0           | AG01-4   | 7mer-m8 | accgucGUGGCUCCUCCUGCU   | gauuccCAGGG-CGGGGAGc      | 0            |
| MIMAT0000762 | hsa-miR-324-3p   | ENSG00000224614 | TNK2-AS1 | antisense | chr3      | 195637240 | 195637258 | +      | 1        | 0           | AG01-4   | 7mer-m8 | ggucGUGGACCCUCCUGCU     | uuccCAGGG-CGGGGAGc        | 4            |
| MIMAT0018192 | hsa-miR-3918     | ENSG00000224614 | TNK2-AS1 | antisense | chr3      | 195637250 | 195637271 | +      | 1        | 0           | AG01-4   | 7mer-m8 | ucgaguuagAGC-CGGGGAGc   | cgggc-aggCUCAGGZCCUUGu    | 0            |
| MIMAT0004548 | hsa-miR-129-1-3p | ENSG00000224614 | TNK2-AS1 | antisense | chr3      | 195637323 | 195637346 | +      | 1        | 0           | AG01-4   | 7mer-m8 | uuugaaaaACCCC-AUUCGCCAa | cgggc-gcgUGGAGCCCAAGGGCUc | 2            |
| MIMAT0004605 | hsa-miR-129-2-3p | ENSG00000224614 | TNK2-AS1 | antisense | chr3      | 195637323 | 195637346 | +      | 1        | 0           | AG01-4   | 7mer-m8 | uacgaaaaACCCC-AUUCGCCAa | cgggc-gcgUGGAGCCCAAGGGCUc | 1            |
| MIMAT0000443 | hsa-miR-125a-5p  | ENSG00000224614 | TNK2-AS1 | antisense | chr3      | 195637329 | 195637351 | +      | 1        | 0           | AG01-4   | 7mer-m8 | aguguccaaUUCAGAGUCCU    | cgugagcccAAGG-CUCAGGGc    | 5            |
| MIMAT0000423 | hsa-miR-125b-5p  | ENSG00000224614 | TNK2-AS1 | antisense | chr3      | 195637331 | 195637351 | +      | 1        | 0           | AG01-4   | 7mer-m8 | aguguccaaUCCAGAGUCCU    | uggagcccAAGG-CUCAGGGc     | 4            |
| MIMAT0016870 | hsa-miR-4319     | ENSG00000224614 | TNK2-AS1 | antisense | chr3      | 195637335 | 195637351 | +      | 1        | 0           | AG01-4   | 7mer-m8 | caccgaaGAGUCCU          | gcccaggGCUAGGGc           | 0            |
| MIMAT0000752 | hsa-miR-328-3p   | ENSG00000224614 | TNK2-AS1 | antisense | chr3      | 195637335 | 195637354 | +      | 1        | 0           | AG01-4   | 7mer-m8 | ugccUUCUGUUCUUCUGGUC    | gcccAGGGC-UCAGGGGAc       | 5            |
| MIMAT0004185 | hsa-miR-802      | ENSG00000224614 | TNK2-AS1 | antisense | chr3      | 195637348 | 195637370 | +      | 1        | 0           | AG01-4   | 7mer-m8 | uguccuACUAGAAACAAGAc    | gggccacUCAGCCUUGUACUG     | 2            |
| MIMAT0014989 | hsa-miR-3126-5p  | ENSG00000224614 | TNK2-AS1 | antisense | chr3      | 195637356 | 195637377 | +      | 1        | 0           | AG01-4   | 8mer    | acgaGACCGUAGACAGGGUa    | cgagcCUUGUACUCCUCCUc      | 2            |
| MIMAT0027650 | hsa-miR-6875-5p  | ENSG00000224614 | TNK2-AS1 | antisense | chr3      | 195637358 | 195637377 | +      | 1        | 0           | AG01-4   | 8mer    | agGAGACG-GACCCAGGGAGu   | gcccCUUGUACU-GUCCUCCa     | 6            |
| MIMAT001635  | hsa-miR-452-5p   | ENSG00000224614 | TNK2-AS1 | antisense | chr3      | 195637387 | 195637408 | +      | 1        | 0           | AG01-4   | 7mer-m8 | agucagaagagcagUUGUcAa   | ugguuuuuuuacaAAACAGUu     | 5            |
| MIMAT0019759 | hsa-miR-4676-3p  | ENSG00000224614 | TNK2-AS1 | antisense | chr3      | 195637387 | 195637408 | +      | 1        | 0           | AG01-4   | 7mer-m8 | uuucgguacacacUUGUcAc    | ugguuuuuuuacaAAACAGUu     | 3            |
| MIMAT0025858 | hsa-miR-892c-3p  | ENSG00000224614 | TNK2-AS1 | antisense | chr3      | 195637387 | 195637408 | +      | 1        | 0           | AG01-4   | 7mer-m8 | aggUGAGUUCUUCUUGUcAc    | uggAUUAUAAACAAACAGUu      | 4            |
