# Supplementary material for: TNK2‐AS1 upregulated by YY1 boosts the course of osteosarcoma through targeting miR‐4319/WDR1
Source: PubMed Central journal article supplement — Cancer Sci. 2020 Dec 1;112(2):893–905. doi: 10.1111/cas.14727 (PMC7893995; doi:10.1111/cas.14727), 2020-12-01
Supplement: CAS-112-893-s006.pdf [file CAS-112-893-s006.pdf]

Supplementary table 3 The mRNA targets of miR-4319 selected through starBase.

#please cite:

#Zhou KR, Liu S, Cai L, Bin L, et al. ENCORI: The Encyclopedia of RNA Interactomes.

#2.Li JH, et al.starBase v2.0: decoding miRNA-ceRNA, miRNA-ncRNA and protein-RNA interaction networks from large-scale CLIP-Seq data. Nucleic Acids Res. 2014 Jan;42:D92-7.

| miRNAid      | miRNAname    | geneID          | geneName | geneType       | chromosome | narrowStart | narrowEnd | broadStart | broadEnd  | strand | clipExpN | dograExp | RBP              | PITA | RNA22 | miRmap | microT | miRanda | PicTar | TargetScan | pancancerNum |   |
|--------------|--------------|-----------------|----------|----------------|------------|-------------|-----------|------------|-----------|--------|----------|----------|------------------|------|-------|--------|--------|---------|--------|------------|--------------|---|
| MIMAT0016870 | hsa-miR-4319 | ENSG00000198952 | SMG5     | protein_coding | chr1       | 156219322   | 156219328 | 156219321  | 156219349 | -      | 5        | 5        | AGO1,AGO1-4,AGO2 | 0    | 0     | 0      | 1      | 0       | 0      | 0          | 1            | 0 |
| MIMAT0016870 | hsa-miR-4319 | ENSG00000198952 | SMG5     | protein_coding | chr1       | 156219771   | 156219799 | 156219771  | 156219799 | -      | 1        | 0        | AGO1-4           | 0    | 0     | 0      | 1      | 0       | 0      | 0          | 0            | 0 |
| MIMAT0016870 | hsa-miR-4319 | ENSG00000198952 | SMG5     | protein_coding | chr1       | 156244448   | 156244476 | 156244448  | 156244476 | -      | 2        | 0        | AGO1-4,AGO2      | 0    | 0     | 0      | 1      | 0       | 0      | 0          | 0            | 0 |
| MIMAT0016870 | hsa-miR-4319 | ENSG00000156521 | TYSD1    | protein_coding | chr10      | 71899023    | 71899030  | 71899023   | 71899051  | -      | 5        | 6        | AGO1-4,AGO2      | 0    | 0     | 0      | 1      | 0       | 0      | 0          | 1            | 0 |
| MIMAT0016870 | hsa-miR-4319 | ENSG00000156521 | TYSD1    | protein_coding | chr10      | 71899592    | 71899620  | 71899592   | 71899620  | -      | 2        | 0        | AGO1-4           | 0    | 0     | 0      | 1      | 0       | 0      | 0          | 0            | 0 |
| MIMAT0016870 | hsa-miR-4319 | ENSG00000156521 | TYSD1    | protein_coding | chr10      | 71899732    | 71899760  | 71899732   | 71899760  | -      | 1        | 0        | AGO1-4           | 0    | 0     | 0      | 1      | 0       | 0      | 0          | 0            | 0 |
| MIMAT0016870 | hsa-miR-4319 | ENSG00000167566 | NCKAP5L  | protein_coding | chr12      | 50185422    | 50185429  | 50185422   | 50185450  | -      | 1        | 3        | AGO1-4           | 0    | 0     | 0      | 1      | 0       | 0      | 0          | 1            | 0 |
| MIMAT0016870 | hsa-miR-4319 | ENSG00000167566 | NCKAP5L  | protein_coding | chr12      | 50185625    | 50185653  | 50185625   | 50185653  | -      | 2        | 0        | AGO2             | 0    | 0     | 0      | 1      | 0       | 0      | 0          | 0            | 0 |
| MIMAT0016870 | hsa-miR-4319 | ENSG00000167566 | NCKAP5L  | protein_coding | chr12      | 50190305    | 50190333  | 50190305   | 50190333  | -      | 4        | 0        | AGO1-4,AGO2      | 0    | 0     | 0      | 1      | 0       | 0      | 0          | 0            | 0 |
| MIMAT0016870 | hsa-miR-4319 | ENSG00000138867 | GUCD1    | protein_coding | chr22      | 24936610    | 24936615  | 24936609   | 24936637  | -      | 3        | 4        | AGO1-4,AGO2,AGO3 | 0    | 0     | 1      | 1      | 0       | 0      | 0          | 0            | 0 |
| MIMAT0016870 | hsa-miR-4319 | ENSG00000138867 | GUCD1    | protein_coding | chr22      | 24936773    | 24936801  | 24936773   | 24936801  | -      | 1        | 0        | AGO2             | 0    | 0     | 0      | 1      | 0       | 0      | 0          | 0            | 0 |
| MIMAT0016870 | hsa-miR-4319 | ENSG00000138867 | GUCD1    | protein_coding | chr22      | 24940009    | 24940037  | 24940009   | 24940037  | -      | 4        | 0        | AGO1-4           | 0    | 0     | 0      | 1      | 0       | 0      | 0          | 0            | 0 |
| MIMAT0016870 | hsa-miR-4319 | ENSG00000071127 | WDR1     | protein_coding | chr4       | 10076647    | 10076675  | 10076647   | 10076675  | -      | 2        | 0        | AGO1-4           | 0    | 0     | 0      | 1      | 0       | 0      | 0          | 0            | 0 |
| MIMAT0016870 | hsa-miR-4319 | ENSG00000071127 | WDR1     | protein_coding | chr4       | 10076963    | 10076969  | 10076963   | 10076991  | -      | 12       | 4        | AGO1-4,AGO2      | 0    | 0     | 0      | 1      | 0       | 1      | 0          | 1            | 0 |
| MIMAT0016870 | hsa-miR-4319 | ENSG00000156709 | AIPW1    | protein_coding | chrX       | 129264006   | 129264012 | 129264006  | 129264034 | -      | 5        | 6        | AGO1-4,AGO2      | 0    | 0     | 0      | 1      | 0       | 1      | 0          | 1            | 0 |
| MIMAT0016870 | hsa-miR-4319 | ENSG00000156709 | AIPW1    | protein_coding | chrX       | 129283489   | 129283517 | 129283489  | 129283517 | -      | 1        | 0        | AGO1-4           | 0    | 0     | 0      | 1      | 0       | 0      | 0          | 0            | 0 |
