# Supplementary figures and images for: TNK2‐AS1 upregulated by YY1 boosts the course of osteosarcoma through targeting miR‐4319/WDR1
Source: PubMed Central journal article supplement — Cancer Sci. 2020 Dec 1;112(2):893–905. doi: 10.1111/cas.14727 (PMC7893995; doi:10.1111/cas.14727), 2020-12-01

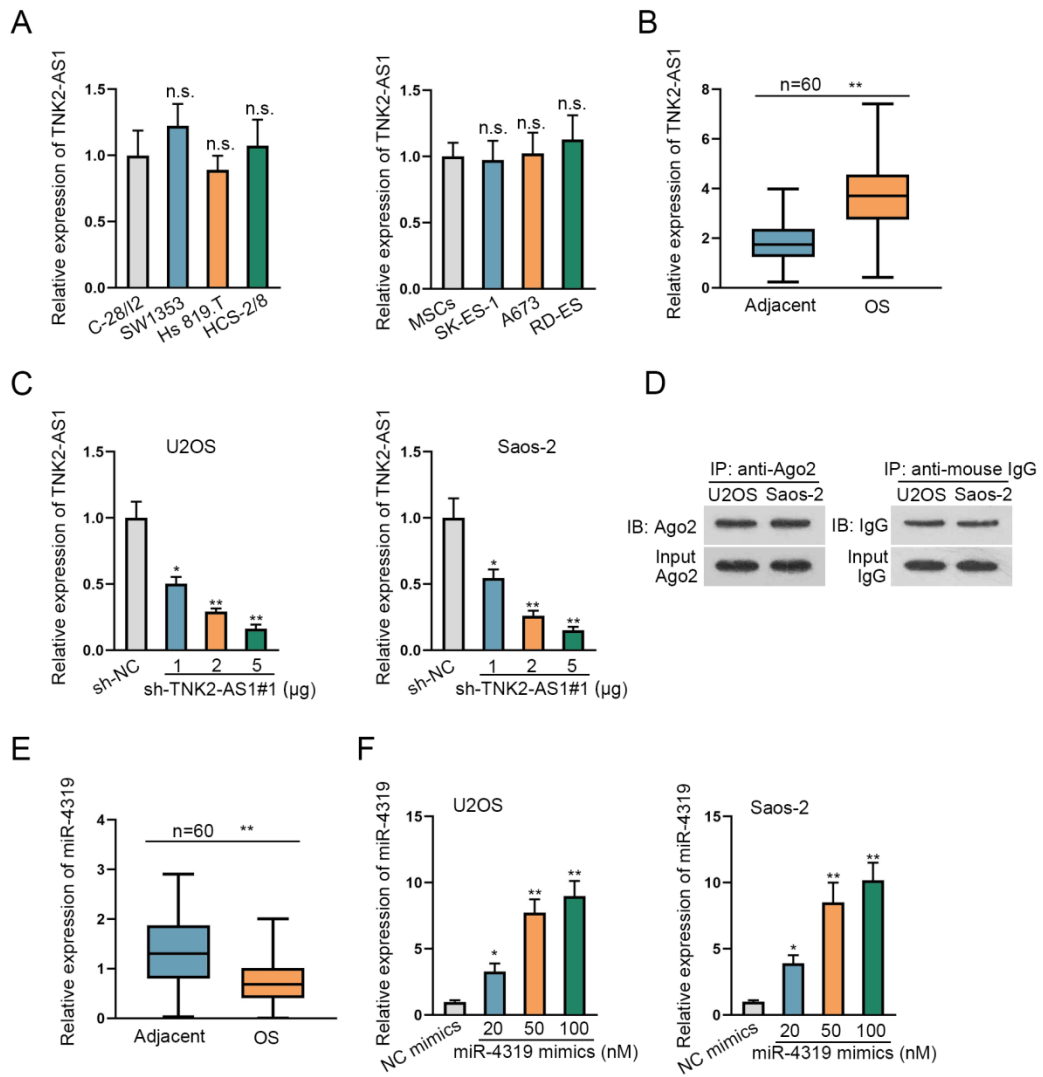

**Supplemental figure 1 TNK2-AS1 was upregulated while miR-4319 was downregulated in OS**

Supplement: CAS-112-893-s001.pdf [file CAS-112-893-s001.pdf]

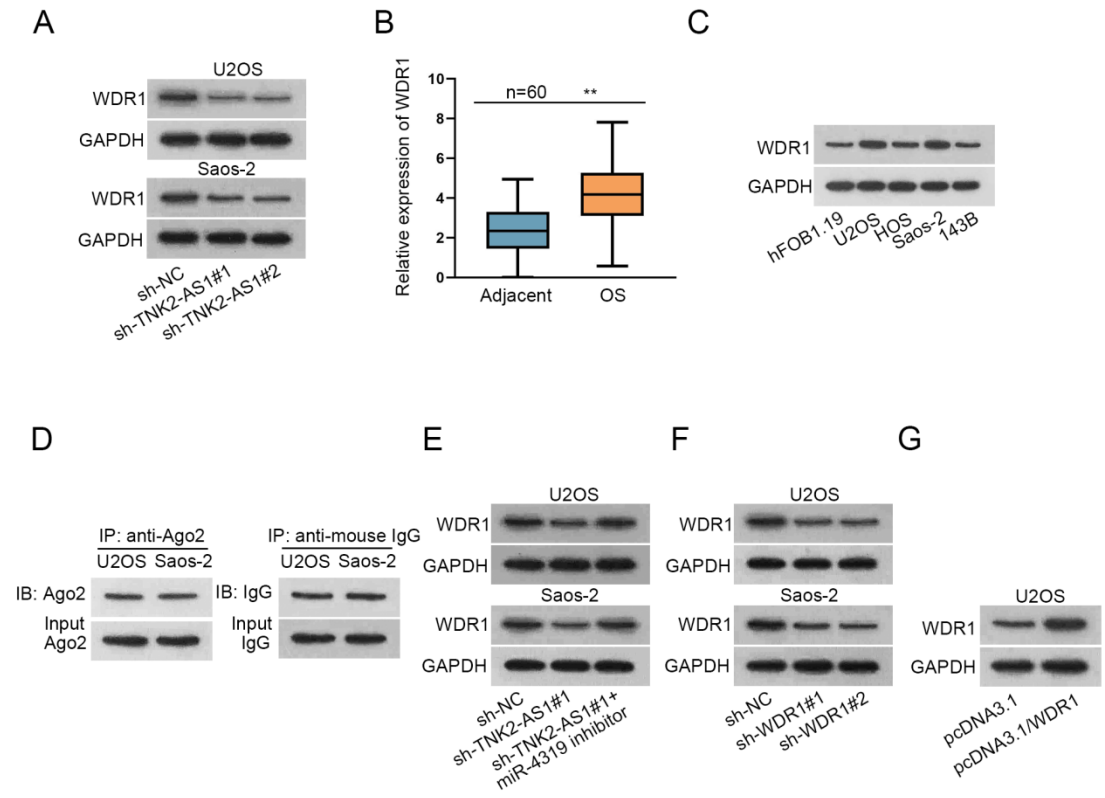

**Supplemental figure 2 WDR1 elevated in OS was regulated by TNK2-AS1/miR-4319 axis**

Supplement: CAS-112-893-s002.pdf [file CAS-112-893-s002.pdf]
